# Supplementary material
Source: PubMed Central journal article supplement (PMC5369587)
Supplement: flgastro-2014-100542-s1.pdf [file flgastro-2014-100542-s1.pdf]

## **SUPPLEMENTARY MATERIAL**

### **Methods**

Hospital Episode Statistics (HES) data are provided by the Health and Social Care Information Centre (HSCIC) via a commercial reuse licence. Each HES record in this dataset contains a unique reference number that enables individual anonymised HES records to be tracked through the healthcare system (including inpatient and outpatient departments) over time.

The Office of Population Censuses and Surveys (OPCS) Classification of Interventions and Procedures version 4 (OPCS-4) is a procedural classification for the coding of operations, procedures and interventions performed during inpatient stays, day case surgery and some outpatient attendances in the National Health Service.

Prescribing analysis and cost tabulation (PACT) is a national dataset published by the HSCIC that records primary-care prescribing data in terms of cost and number of items (volume).

---

**Supplementary Tables**

**Supplementary Table 1** Primary gastrointestinal ICD-10 diagnosis codes excluded from the data collection

---

| <b>Malignant neoplasms of stomach</b>                                                    |                                                                              |
|------------------------------------------------------------------------------------------|------------------------------------------------------------------------------|
| C16.0 Malignant neoplasm of cardia of stomach                                            | C16.1 Malignant neoplasm of fundus of stomach                                |
| C16.2 Malignant neoplasm of body of stomach                                              | C16.3 Malignant neoplasm of pyloric antrum                                   |
| C16.4 Malignant neoplasm of pylorus                                                      | C16.5 Malignant neoplasm of lesser curvature of stomach, unspecified         |
| C16.6 Malignant neoplasm of greater curvature of stomach, unspecified                    | C16.8 Malignant neoplasm overlapping sites of stomach                        |
| <b>Diverticular disease</b>                                                              |                                                                              |
| K57.0 Diverticular disease of small intestine with perforation and abscess               | K57.1 Diverticular disease of small intestine without perforation or abscess |
| K57.2 Diverticular disease of large intestine with perforation and abscess               | K57.3 Diverticular disease of large intestine without perforation or abscess |
| K57.8 Diverticular disease of intestine, partly unspecified with perforation and abscess | K90.0 Coeliac disease                                                        |
| <b>Inflammatory bowel disease</b>                                                        |                                                                              |
| K50.0 Crohn's disease of small intestine                                                 | K50.1 Crohn's disease of large intestine                                     |
| K50.8 Other Crohn's disease                                                              | K50.9 Crohn's disease, unspecified                                           |
| K51.0 Ulcerative (chronic) enterocolitis                                                 | K51.1 Ulcerative (chronic) ileocolitis                                       |
| K51.2 Ulcerative (chronic) proctitis                                                     | K51.3 Ulcerative (chronic) rectosigmoiditis                                  |
| K51.8 Other ulcerative colitis                                                           | K51.9 Ulcerative colitis, unspecified                                        |

---

---

**Supplementary Table 2** OPCS-4 codes

---

|     |                                                                                  |
|-----|----------------------------------------------------------------------------------|
| H22 | Diagnostic endoscopic examination of colon                                       |
| H25 | Diagnostic endoscopic examination of lower bowel using fibre optic sigmoidoscope |
| H28 | Diagnostic endoscopic examination of sigmoid colon using rigid sigmoidoscope     |

---
